# Supplementary material for: The Lysine Demethylases KdmA and KdmB Differently Regulate Asexual Development, Stress Response, and Virulence in Aspergillus fumigatus
Source: MDPI journal article supplement (doi:10.3390/jof8060590), 2022-05-31
Supplement: s1 [file s1]

**Table S1. Oligonucleotides used in this study.**

| Name      | Sequence (5'→3') <sup>a</sup> | Purpose                                 |
|-----------|-------------------------------|-----------------------------------------|
| oligo346  | CCATGTGTGTCGAGTCCTTC          | 5' <i>efl</i> for qRT-PCR normalization |
| oligo347  | GAACGTACAGCAACAGTCTGG         | 3' <i>efl</i> for qRT-PCR normalization |
| oligo303  | GCTACCACTCTGCATCCTCA          | 5' <i>abaA</i> for qRT-PCR              |
| oligo304  | TACGAGCTCCAGCATGATTC          | 3' <i>abaA</i> for qRT-PCR              |
| oligo305  | ACGGCAGGAAGTTGTCTTCT'         | 5' <i>wetA</i> for qRT-PCR              |
| oligo306  | CTGTCAGCGACTTGTTGGAT          | 3' <i>wetA</i> for qRT-PCR              |
| oligo256  | TTCCAAGCAGAGCTTGTCAC          | 5' <i>brlA</i> for qRT-PCR              |
| oligo257  | CCAGGTTCTTTGCACTTGAA          | 3' <i>brlA</i> for qRT-PCR              |
| oligo1557 | TTCCACACCAACCTCGATGA          | 5' <i>imd2</i> for qRT-PCR              |
| oligo1558 | GAGACAAGGTTTCCGTCTGC          | 3' <i>imd2</i> for qRT-PCR              |
| oligo1559 | GGGTTGAAGGTGCAGGAGTA          | 5' <i>sdt1</i> for qRT-PCR              |
| oligo1560 | GTCTCCCTTTCCGCAAACCTC         | 3' <i>sdt1</i> for qRT-PCR              |
| oligo273  | AGTCTCGGACGGACTGATCT          | 5' <i>laeA</i> for qRT-PCR              |
| oligo247  | GATACTTGTTGGCCACATCG          | 3' <i>laeA</i> for qRT-PCR              |
| oligo271  | AAATCCATCACATCCACCCT          | 5' <i>gliZ</i> for qRT-PCR              |
| oligo272  | GGTTGTTTCATGGTCAGTTGC         | 3' <i>gliZ</i> for qRT-PCR              |

---

|           |                                                        |                                                             |
|-----------|--------------------------------------------------------|-------------------------------------------------------------|
| oligo1591 | GCCCTATGCAGCTTTCTTCC                                   | 5' catalase for qRT-PCR                                     |
| oligo1592 | TCCATCATCCGCTCTCTTCC                                   | 3' catalase for qRT-PCR                                     |
| oligo1593 | GGTCAGTTCCAGCCTCTTCT                                   | 5' MnSOD for qRT-PCR                                        |
| oligo1594 | CTTGAAGTACTCGGCCTTGC                                   | 3' MnSOD for qRT-PCR                                        |
| oligo1595 | CTGGGAGAGAAGAAGCCCAA                                   | 5' thioredoxin reductase for qRT-PCR                        |
| oligo1596 | GCATAGAAGAGACCGTTGGC                                   | 3' thioredoxin reductase for qRT-PCR                        |
| oligo1597 | ACGCAGATCCTCAAGTCGAT                                   | 5' quinone oxidoreductase for qRT-PCR                       |
| oligo1598 | GCCAGTGATCTCCTTCACCT                                   | 3' quinone oxidoreductase for qRT-PCR                       |
| oligo697  | GCAATGTAAAGCTAACGTGCGTG                                | 5' <i>AnpyrG</i> marker                                     |
| oligo698  | TGCCTTTAAGCTTCGGGTAGAG                                 | 3' <i>AnpyrG</i> marker                                     |
| oligo1402 | GCAGCCACCAAAGTTACCTT                                   | 5' flanking region of <i>AfukdmA</i>                        |
| oligo1403 | <i>TTGTAGGCTTTGGGCTGTTCA</i> ATCGATAAAGATGAGAGCGCC     | 5' <i>AfukdmA</i> with <i>AnpyrG</i> tail                   |
| oligo1404 | <i>CTGATCTACCCCTTGGAACGCAGCAT</i> GGAAGATGGTGCTTG CATG | 3' <i>AfukdmA</i> with <i>AnpyrG</i> tail                   |
| oligo1405 | TGAGCGCCAGTAAAGGAAGA                                   | 3' flanking region of <i>AfukdmA</i>                        |
| oligo1406 | GGTGTTTCCCATCCTGCAAA                                   | 5' nested of <i>AfukdmA</i>                                 |
| oligo1407 | GATCGCAAGCGAAGAGTAAG                                   | 3' nested of <i>AfukdmA</i>                                 |
| oligo1513 | <i>TAGTTCTGTTACCGAGCCGGCAT</i> GCAAGCACCATCTTCCA       | 3' <i>AfukdmA</i> with <i>hygR</i> tail for complementation |
| oligo1514 | <i>GCTCTGAACGATATGCTCCAACAT</i> GCTCTCTGTACATGCGTG     | 5' <i>AfukdmA</i> with <i>hygR</i> tail for complementation |

---

|           |                                                                             |                                                             |
|-----------|-----------------------------------------------------------------------------|-------------------------------------------------------------|
| oligo1396 | TTACCTTGTCGTCCGTTTGC                                                        | 5' flanking region of <i>AfukdmB</i>                        |
| oligo1397 | <i>TTGTAGGCTTTGGGCTGTT</i> CACAAAGCTGGGTGGGGGACAAA                          | 5' <i>AfukdmB</i> with <i>AnpyrG</i> tail                   |
| oligo1398 | <i>CTGATCTACCCCTTGGAACGCAGCATT</i> TACGAACGGAAGCACTG                        | 3' <i>AfukdmB</i> with <i>AnpyrG</i> tail                   |
| oligo1399 | TTGGGTGGATGCCGAAAAG                                                         | 3' flanking region of <i>AfukdmB</i>                        |
| oligo1400 | ATTCGACCCTTGCCTCATCA                                                        | 5' nested of <i>AfukdmB</i>                                 |
| oligo1401 | GTTCGGCTTGATGATCGGTT                                                        | 3' nested of <i>AfukdmB</i>                                 |
| oligo1511 | <i>TAGTTCTGTTACCGAGCCGGCAGTGCTTCCGTT</i> CGTGAAA                            | 3' <i>AfukdmB</i> with <i>hygR</i> tail for complementation |
| oligo1512 | <i>GCTCTGAACGATATGCTCCAACCCGATTGTATT</i> CCTCTTCGG                          | 5' <i>AfukdmB</i> with <i>hygR</i> tail for complementation |
| oligo1422 | CCGGCTCGGTAAACAGAACTANNNNNNNNNNGCCNNNNNNNNNN<br>CAGAACGGCGTAACCAAAAAGTCAC   | 5' of <i>hygR</i>                                           |
| oligo1423 | GTTGGAGCATATCGTTCAGAGCNNNNNNNNNNNTAGNNNNNNNNNN<br>NTTCATCTTGACGACCGTTGATCTG | 3' of <i>hygR</i>                                           |

---

<sup>a</sup> Tail sequence is in italic.
